# Supplementary material for: Genomic Characterization of a Bataï Orthobunyavirus, Previously Classified as Ilesha Virus, from Field-Caught Mosquitoes in Senegal, Bandia 1969
Source: MDPI journal article supplement (doi:10.3390/v16020261), 2024-02-06
Supplement: s1 [file s1]

Table S1: Accession number of strains downloaded on Genbank

| Strains                                  | Accession S | Accession M | Accession L | Country        | date of collection |
|------------------------------------------|-------------|-------------|-------------|----------------|--------------------|
| Batai virus isolate PV424                | MH299972.1  | MH299973.1  | MH299974.1  | Germany        | 2016               |
| Batai virus strain Chittoor IG 20217     | JX846598.1  | JX846599.1  | JX846600.1  | India          | 1957               |
| Batai virus strain CVOV 41.3             | KM507321.1  | KM507322.1  | KM507323.1  | Austria        | 2013               |
| Batai virus strain Italy 2009            | KC168046.1  | KC168047.1  | KC168048.1  | Italy          | 2009               |
| Batai virus strain MM2222                | JX846595.1  | JX846596.1  | JX846597.1  | Malaysia       | 1955               |
| Batai virus strain NM 12                 | KJ187040.1  | KJ187039.1  | KJ187038.1  | China          | 2012               |
| Batai virus strain UgMP 6830             | JX846601.1  | JX846602.1  | JX846603.1  | Uganda         |                    |
| Batai virus ZJ2014                       | KU746869.1  | KU746870.1  | KU746871.1  | China          | 2014               |
| Bunyamwera virus                         | NC_001927.1 | NC_001926.1 | NC_001925.1 | NA             | NA                 |
| Bunyamwera virus isolate MGD S1 12060 WT | KM507344.1  | KM507340.1  | KM507338.1  | Kenya          | 2009               |
| Bunyamwera virus strain 46A 122          | MH484290.1  | MH484289.1  | MH484288.1  | Kenya          | 2006               |
| Bunyamwera virus strain 84Brakna ME      | MT731757.1  | MT731756.1  | MT731755.1  | Mauritania     | 2015               |
| Bunyamwera virus strain ATCC(R) VR 87    | MZ773507.1  | MZ773506.1  | MZ773505.1  | Uganda         | 1943               |
| Bunyamwera virus strain GSA S4 11232 WT  | KC512400.1  | KC512389.1  | KC512393.1  | Kenya          | 2009               |
| Calovo virus strain 134                  | KJ542624.1  | KJ542625.1  | KJ542626.1  | Czech Republic | 1963               |
| Calovo virus strain 138 pool 468         | KC608157.1  | KC608156.1  | KC608155.1  | Yugoslavia     | 1983               |
| Calovo virus strain 8020                 | KJ542630.1  | KJ542631.1  | KJ542632.1  | Slovakia       | 1975               |
| Calovo virus strain 8040                 | KJ542633.1  | KJ542634.1  | KJ542635.1  | Slovakia       | 1975               |
| Calovo virus strain JAn (MS3)            | KJ542627.1  | KJ542628.1  | KJ542629.1  | Croatia        | 1969               |
| Ilesha ILESHA/8e                         | KC608151.1  | KC608150.1  | KC608149.1  | Senegal        | 1972               |
| Ilesha KO/2                              | MT272830.1  | MT272831.1  | MT272832.1  | Nigeria        | 1967               |
| Ilesha R5964                             | NC_043585.1 | NC_043586.1 | NC_043587.1 | NA             | NA                 |
| Kairi virus strain BeAr8226              | KR260740.1  | KR260739.1  | KR260738.1  | Brazil         | 1957               |
| Ngari virus isolate GSA TS7 5170 WT      | KM507341.1  | KM514677.1  | KM507336.1  | Kenya          | 2009               |
| Ngari virus isolate ISL TS2 5242 WT      | KM507342.1  | KM514678.1  | KM507334.1  | Kenya          | 2009               |
| Ngari virus isolate KE B02               | ON755203.1  | ON755197.1  | ON755193.1  | Kenya          | 2020               |
| Ngari virus isolate KE B35               | ON755202.1  | ON755196.1  | ON755192.1  | Kenya          | 2020               |
| Ngari virus isolate KE C166              | ON755201.1  | ON755199.1  | ON755195.1  | Kenya          | 2020               |
| Ngari virus isolate KE O93               | ON755200.1  | ON755198.1  | ON755194.1  | Kenya          | 2020               |
| Ngari virus isolate TND S1 19801 WT      | KM507343.1  | KM514679.1  | KM507335.1  | Kenya          | 2010               |
| Ngari virus strain 15Guidimaka ME        | MT747974.1  | MT747973.1  | MT747972.1  | Mauritania     | 2015               |
| Ngari virus strain 428Trarza ME          | MT747977.1  | MT747976.1  | MT747975.1  | Mauritania     | 2015               |
| Ngari virus strain 9800521               | JX857325.1  | JX857326.1  | JX857327.1  | Somalia        | 1998               |
| Ngari virus strain 9800535               | JX857328.1  | JX857329.1  | JX857330.1  | Kenya          | 1998               |
| Ngari virus strain Adrar                 | KJ716848.1  | KJ716849.1  | KJ716850.1  | Mauritania     | 2010               |
| Ngari virus strain Dakar D28542 4e       | KC608154.1  | KC608153.1  | KC608152.1  | Senegal        | 1980               |
| Ngari virus strain SUD HKV141            | JX857322.1  | JX857323.1  | JX857324.1  | Sudan          | 1988               |
| Ngari virus strain SUD HKV66             | JX857319.1  | JX857320.1  | JX857321.1  | Sudan          | 1988               |
